# Supplementary material for: MicroRNAs Regulate Sleep and Sleep Homeostasis in Drosophila
Source: PubMed Central journal article supplement — Cell Rep. Author manuscript; Available in PMC 2018 Aug 14. (PMC6091868; doi:10.1016/j.celrep.2018.05.078), 2018-06-26
Supplement: NIHMS1500507-supplement-1.pdf [file NIHMS1500507-supplement-1.pdf]

**Cell Reports, Volume 23**

**Supplemental Information**

**MicroRNAs Regulate Sleep and Sleep Homeostasis  
in *Drosophila***

**Patricia R. Goodwin, Alice Meng, Jessie Moore, Michael Hobin, Tudor A. Fulga, David Van Vactor, and Leslie C. Griffith**

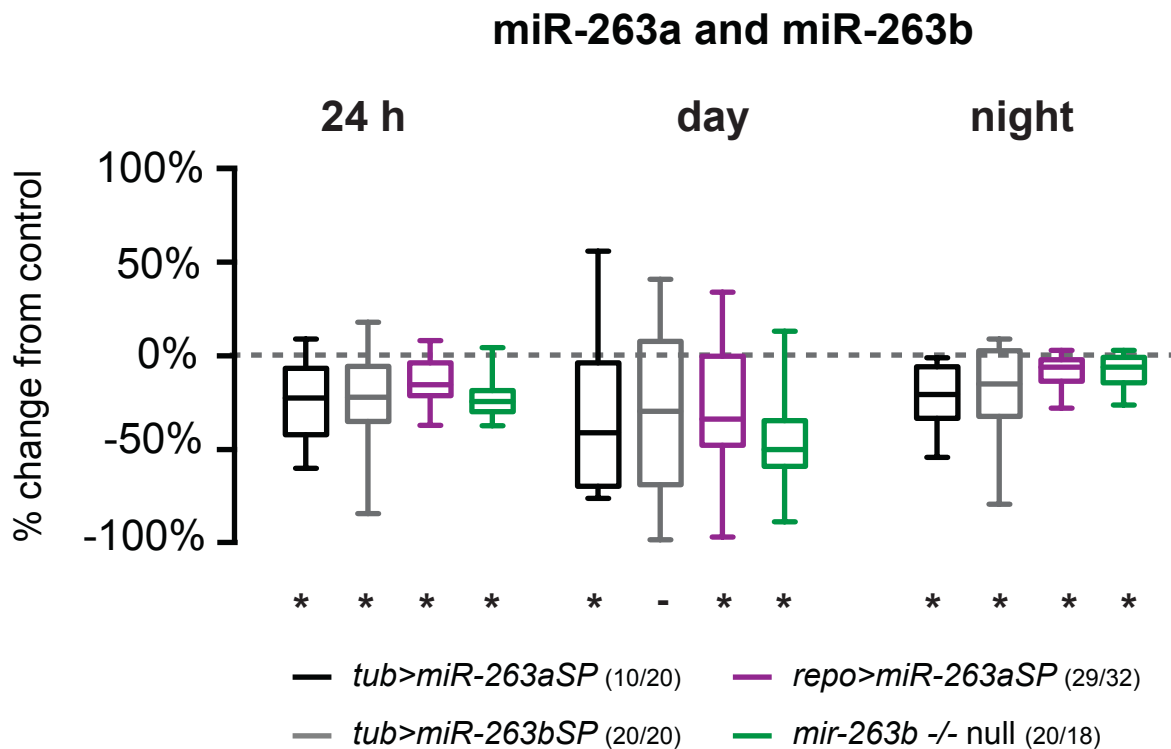

**Supplemental Figure 1. Sponges targeting miRs in the same family have similar effects on sleep. Related to Figure 3.** Ubiquitous expression of miR-263aSP decreased 24 h, day, and night sleep. Although miR-263bSP did not satisfy all the criteria to be considered a hit, it was very close to the cut-off (24 h sleep for control group: -22%,  $p < 0.05$ ; 24 h sleep for SD group: -19%,  $p = 0.057$ ). We found that miR-263a is not required in neurons for its effect on sleep (Table 1). However, inhibition of miR-263a in glia via expression of miR-263aSP with *repo Gal4* significantly reduced 24 h, day, and night sleep. We were not able to investigate the effect of *mir-263a* mutations on sleep, because homozygous mutants are not viable as adults; however *mir-263b* mutants displayed reduced 24 h, day, and night sleep relative to controls. These results support a glial role for the miR-263 family in sleep.

Figure shows percent change in 24 h, day, and night sleep relative to scramble or genetic background control after inhibition of miR-236a and miR-263b by expression of sponges with *tubulinGal4* (grey plots), glia-specific *repoGal4* (purple plots), or through knockout of the *mir-263b* gene (green). \* $p < 0.05$ , -'  $p > 0.05$  using Mann-Whitney test. N values are reported next to genotype.

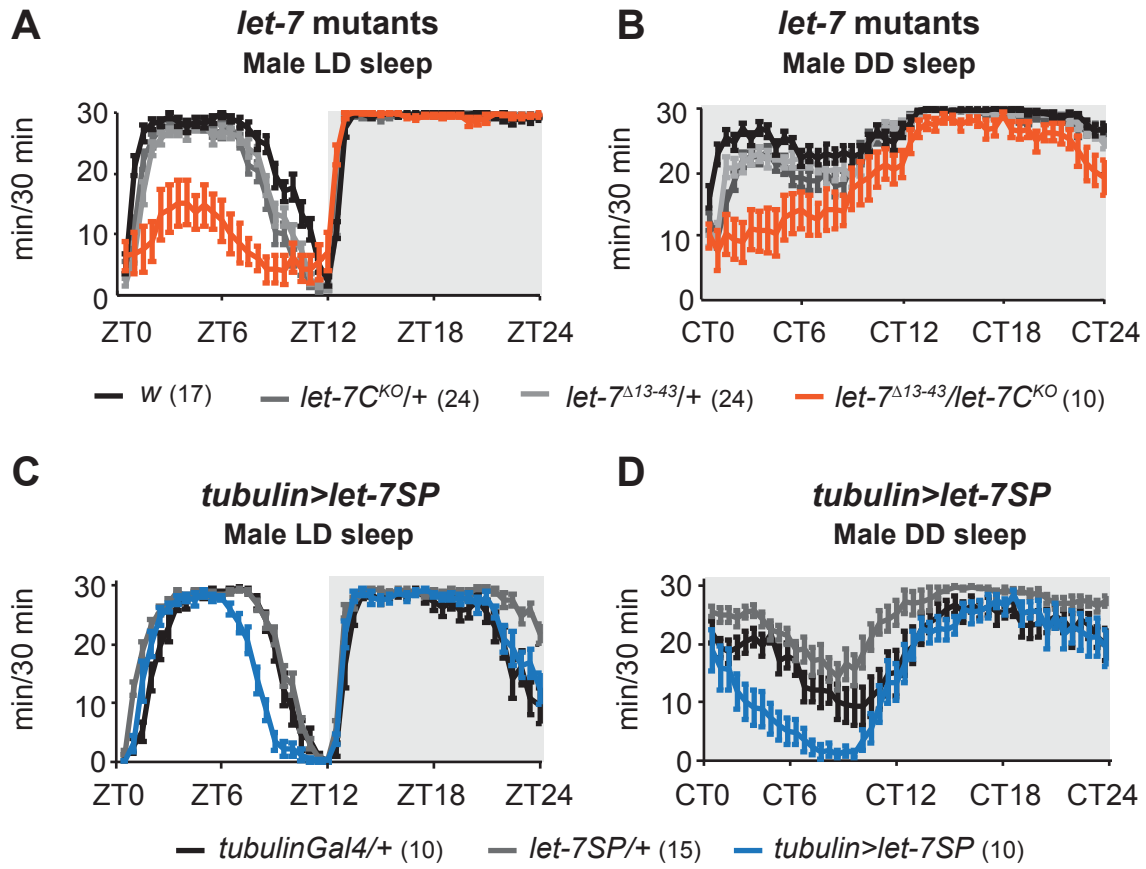

**Supplemental Figure 2. Let-7 regulates sleep in males. Related to Figure 4.** Sleep per 30 min in *let-7CKO/let-7Δ13-43*, *let-7CKO/+*, *let-7Δ13-43/+*, and *w* male flies in L:D (A) and D:D (B). Sleep per 30 min in *tubulin>let-7SP*, *tubulinGal4/+*, and *UAS-let-7SP* male flies in L:D (C) and D:D (D). N values are reported next to genotype.

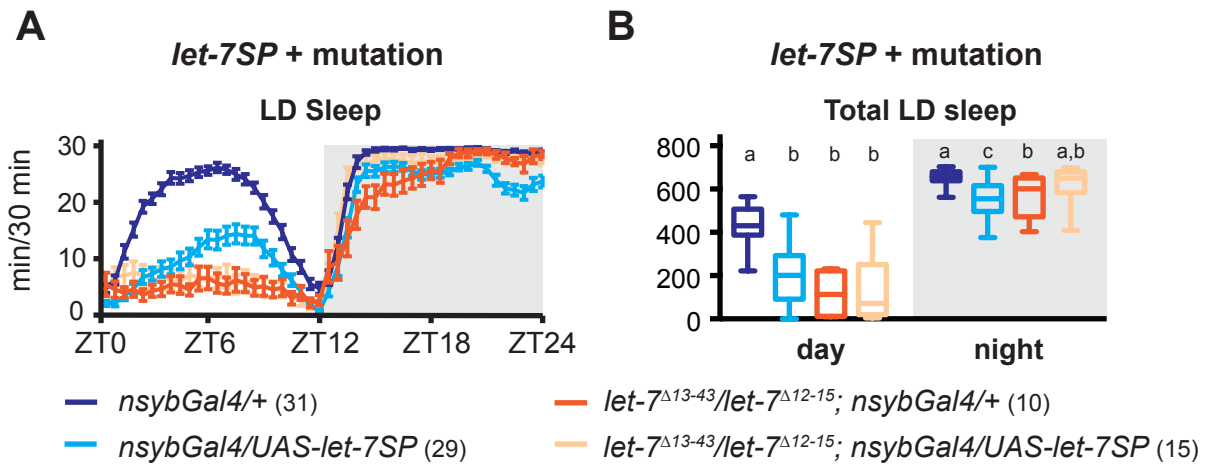

**Supplemental Figure 3. Let-7SP and let-7 mutations affect sleep through the same pathway. Related to Figure 4.** Sleep per 30 min (A) and total sleep (B) for female *let-7* mutant flies expressing *let-7SP* in neurons (*w; let-7<sup>Δ13-43</sup>/let-7<sup>Δ12-15</sup>; nsybGal4/UAS-let-7SP*), *let-7* mutant flies (*w; let-7<sup>Δ13-43</sup>/let-7<sup>Δ12-15</sup>; nsybGal4/+*), flies expressing *let-7SP* in neurons (*w;; nsybGal4/UAS-let-7SP*) and control (*nsybGal4/+*) flies. Flies with both the sponge and mutations were not significantly different from flies with the sponge alone or mutations alone (Kruskal-Wallis,  $p < 0.05$ ). N values are reported next to genotype.

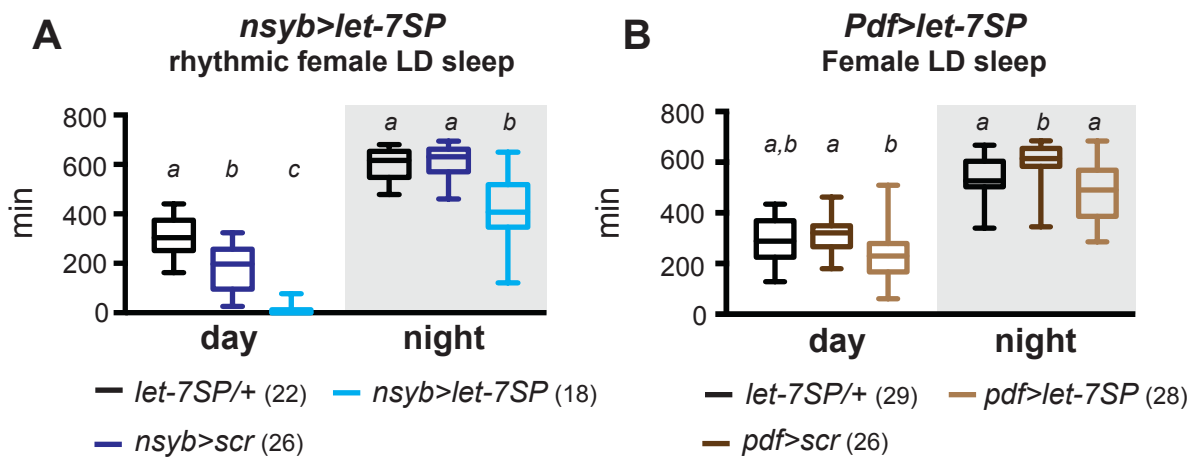

**Supplemental Figure 4. Related to Table 2 (A)** *Nsyb>let-7SP* flies with normal circadian rhythms have reduced sleep. Total sleep in *nsyb>let-7SP*, *nsyb>scramble*, and *UAS-let-7SP/+* females in L:D after excluding any flies that were later arrhythmic in D:D. **(B)** *Let-7* is not required in PDF+ neurons to promote sleep. Total sleep in *PDF>let-7SP*, *PDF>scramble*, and *UAS-let-7SP/+* female flies in L:D.
