# Supplementary material for: MicroRNAs Regulate Sleep and Sleep Homeostasis in Drosophila
Source: PubMed Central journal article supplement — Cell Rep. Author manuscript; Available in PMC 2018 Aug 14. (PMC6091868; doi:10.1016/j.celrep.2018.05.078), 2018-06-26
Supplement: NIHMS1500507-supplement-2.pdf [file NIHMS1500507-supplement-2.pdf]

## MicroRNAs Regulate Sleep and Sleep Homeostasis in *Drosophila*

### Graphical Abstract

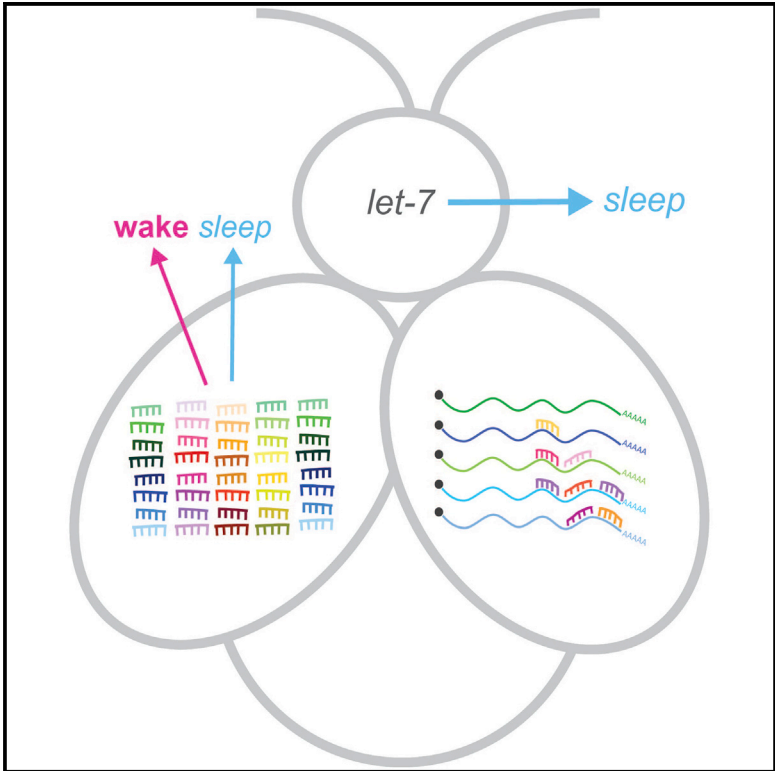

### Authors

Patricia R. Goodwin, Alice Meng, Jessie Moore, Michael Hobin, Tudor A. Fulga, David Van Vactor, Leslie C. Griffith

### Correspondence

griffith@brandeis.edu

### In Brief

To examine the role of microRNAs in sleep, Goodwin et al. screened a *Drosophila* microRNA sponge library, identifying 25 microRNAs that regulate sleep. The majority of these were from families well conserved in vertebrates. Let-7, a strong hit from the screen, has both adult and developmental roles.

### Highlights

- A genetic screen identifies sleep-regulating microRNAs in *Drosophila*
- microRNAs regulate amount, structure and homeostatic regulation of sleep
- Let-7 regulates sleep through developmental and adult-specific pathways

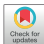

# MicroRNAs Regulate Sleep and Sleep Homeostasis in *Drosophila*

Patricia R. Goodwin,<sup>1</sup> Alice Meng,<sup>1</sup> Jessie Moore,<sup>1</sup> Michael Hobin,<sup>1</sup> Tudor A. Fulga,<sup>2,3</sup> David Van Vactor,<sup>2</sup> and Leslie C. Griffith<sup>1,4,\*</sup>

<sup>1</sup>Department of Biology, Volen National Center for Complex Systems and National Center for Behavioral Genomics, Brandeis University, Waltham, MA 02454-9110, USA

<sup>2</sup>Department of Cell Biology and Program in Neuroscience, Harvard Medical School, Boston, MA 02115, USA

<sup>3</sup>Present address: Weatherall Institute, Oxford University, Oxford, UK

<sup>4</sup>Lead Contact

\*Correspondence: [griffith@brandeis.edu](mailto:griffith@brandeis.edu)

<https://doi.org/10.1016/j.celrep.2018.05.078>

## SUMMARY

To discover microRNAs that regulate sleep, we performed a genetic screen using a library of miRNA sponge-expressing flies. We identified 25 miRNAs that regulate baseline sleep; 17 were sleep-promoting and 8 promoted wake. We identified one miRNA that is required for recovery sleep after deprivation and 8 miRNAs that limit the extent of recovery sleep. 65% of the hits belong to human-conserved families. Interestingly, the majority (75%), but not all, of the baseline sleep-regulating miRNAs are required in neurons. Sponges that target miRNAs in the same family, including the miR-92a/92b/310 family and the miR-263a/263b family, have similar effects. Finally, mutation of one of the screen's strongest hits, *let-7*, using CRISPR/Cas-9, phenocopies sponge-mediated *let-7* inhibition. Cell-type-specific and temporally restricted *let-7* sponge expression experiments suggest that *let-7* is required in the mushroom body both during development and in adulthood. This screen sets the stage for understanding the role of miRNAs in sleep.

## INTRODUCTION

Changes in sleep/wake status are accompanied by changes in gene expression. Sleep not only changes mRNA expression, it also alters levels of non-coding RNAs called microRNAs (miRNAs). miRNAs are small, 20- to 22-nt RNA transcripts that bind to mRNAs in conjunction with the RISC complex. miRNA binding to mRNA targets results in decreased protein synthesis, either via mRNA degradation or decreased translation (Huntzinger and Izaurralde, 2011). In mammals, miRNAs are differentially expressed during sleep and wake (Davis et al., 2007; Davis et al., 2012). Sleep fragmentation can change miRNA expression, and miRNA levels are altered in patients with sleep disorders, including narcolepsy and idiopathic hypersomnia (Holm et al., 2014). Many miRNAs also regulate the function of the circadian clock, which has a role in determining when sleep occurs (Chen et al., 2014a; Vodala et al., 2012). Furthermore,

miRNAs are essential regulators of neuronal differentiation, development, and morphology and could therefore be required for the formation of sleep-regulating neuronal circuits (McNeill and Van Vactor, 2012). Thus, miRNAs are promising candidate regulators of sleep, but the role of miRNAs in sleep has not been comprehensively investigated.

We used *Drosophila* to perform a genetic screen to identify miRNAs that regulate sleep and sleep homeostasis. To inhibit miRNA function in *Drosophila*, we employed a library of transgenic miRNA inhibitors called miRNA sponges. We aimed to identify miRNAs that regulate sleep and identify miRNAs that regulate the homeostatic response to sleep loss. We then determined whether these sleep-regulating miRNAs are required in neurons and compared the effects of sponge-mediated miRNA inhibition with the effects of genetic ablation of the cognate miRNA genes. Finally, we characterized the role of one sleep-regulating miRNA, *let-7*, in greater depth and found that *let-7* is required during both development and adulthood for its effects on sleep and that it is required in the mushroom body.

## RESULTS

### Screen Design

To investigate the role of miRNAs in sleep, we screened a library of 143 transgenic miRNA sponge (*miRSP*) fly lines containing tandem repeats of miRNA response elements (MREs) that bind to the cognate miRNA and prevent it from interacting with its endogenous mRNA target (Fulga et al., 2015). Sponges have multiple advantages over null mutations for screening: they partially inhibit miRNA function, allowing the study of miRNAs that are required for development or survival; miRNAs with similar seed sequences can be inhibited with a single sponge, preventing compensation; and sponge expression can be controlled using the GAL4/UAS expression system. Because sleep is regulated by many cell types (Artushin and Sehgal, 2017), we initially inhibited miRNA activity ubiquitously by expressing sponges with *tubulin-GAL4*. We screened females because their daytime sleep levels are lower than those of males, making it easier to find *miRSPs* that increase sleep.

We measured sleep in 12 hr light:12 hr dark (LD) conditions using an operational definition of sleep as more than 5 min of inactivity (Hendricks et al., 2000; Shaw et al., 2000). Flies from each *tubulin>miRSP* line were divided into two subgroups: a control

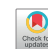

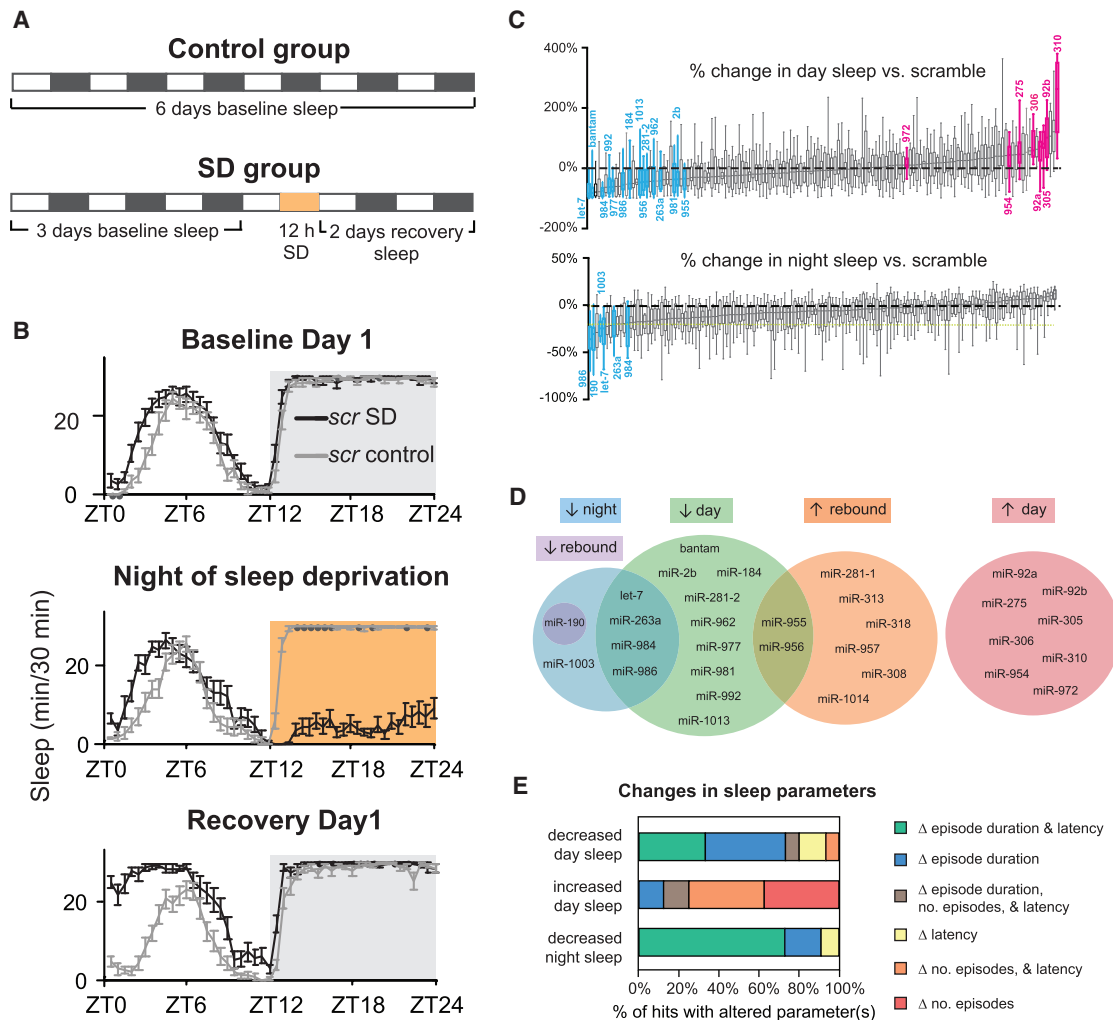

### Figure 1. miR Screen for Sleep

(A) Screen schematic. Sleep data were collected for 6 days under conditions of 12 hr light (white bars):12 hr dark (black bars). On day 4, an SD subgroup of each genotype was sleep-deprived for 12 hr at night (orange bar).

(B) Sleep of *tubulin>scramble* flies (control and SD subgroups) during a representative round of screening. Shown are minutes of sleep per 30 min across 24 hr for the first day of baseline sleep (top), the night of SD (center), and the first day of recovery sleep (bottom).

(C) Percent change in day (top) and night sleep (bottom) relative to *scramble* for all lines. *miRSPs* were considered hits when they varied from *scramble* by 20% or more. Blue, decreased sleep hit; pink, increased sleep hit; gray, non-hit. Values are shown in Table 1.

(D) Venn diagram illustrating the phenotypes hits.

(E) MiRNAs regulate sleep architecture. For baseline hits, changes in sleep architecture (relative to *scramble*) were identified. Error bars represent SEM; whiskers represent maxima and minima.

subgroup, which had uninterrupted sleep for 6 days, and a sleep deprivation (SD) subgroup, which had 3 days of baseline sleep followed by 12 hr of mechanical SD during the dark period (night) and then 2 days of recovery sleep (Figure 1A). For each round of screening, *miRSP*-expressing flies were compared with concurrently assayed *UAS-scramble* control sponge flies (Figure 1B).

An *miRSP* line was considered a “baseline sleep hit” when it met these criteria: (1) total day, night, or 24 hr sleep was significantly different ( $p < 0.05$ ) from *scramble* flies; (2) the percent change in sleep was more than 20%, which represents two SDs of the *scramble* groups across multiple rounds of screening; and (3) both the control subgroup and the SD subgroup’s base-

line sleep had to meet criteria (1) and (2). Because impaired locomotion could be misinterpreted as increased sleep, we confirmed that hits that decreased sleep had normal locomotion. For each hit, we performed follow-up assays that included *UAS-miRSP/+* and *tubulin-GAL4/+* controls.

To discover miRNAs that regulate sleep homeostasis, we examined the amount of sleep lost and recovered after SD. To adjust for differing levels of baseline sleep, we calculated the cumulative change in sleep versus each fly’s own baseline. This was compared with concurrently run *scramble*. To be considered a hit, recovery had to be either lower than *scramble* (under-recovery) or greater than *scramble* (hyper-recovery). We

**Table 1. miRNAs that Regulate Baseline Sleep**

| Screen Hit   | Human Conserv.<br>5' Sequence                                  | Control Group Change in<br>Sleep versus Scramble |       |       | SD Group Change in<br>Sleep versus Scramble |       |       | Control Group Sleep<br>Architecture Changes |                                | Nsyb>miRSP Change in<br>Sleep versus Scramble |       |       |
|--------------|----------------------------------------------------------------|--------------------------------------------------|-------|-------|---------------------------------------------|-------|-------|---------------------------------------------|--------------------------------|-----------------------------------------------|-------|-------|
|              |                                                                | 24 hr                                            | Day   | Night | 24 hr                                       | Day   | Night | Day                                         | Night                          | 24 hr                                         | Day   | Night |
| let-7.5p     | <i>let-7, miR-98, miR-196a/b</i>                               | -42%*                                            | -72%* | -27%* | -32%*                                       | -49%* | -24%* | ↓ ep. dur.,<br>↑ lat.                       | ↑ freq., ↓ ep.<br>dur., ↑ lat. | -73%*                                         | -99%* | -65%* |
| miR-984.5p   | -                                                              | -37%*                                            | -77%* | -22%* | -35%*                                       | -63%* | -23%* | ↓ freq., ↓ ep.<br>dur., ↑ lat.              | ↑ freq., ↓ ep. dur.            | -23%*                                         | -67%* | -13%* |
| miR-986.5p   | <i>miR-513c</i>                                                | -37%*                                            | -41%* | -36%* | -36%*                                       | -38%* | -35%* | ↓ ep. dur.                                  | ↑ freq., ↓ ep.<br>dur., ↑ lat. | -28%*                                         | -57%* | -24%* |
| miR-977.3p   | <i>let-7, miR-98, miR-202</i>                                  | -31%*                                            | -51%* | -21%* | -24%*                                       | -49%* | -12%* | ↓ ep. dur.,<br>↑ lat.                       | ↑ freq., ↓ ep.<br>dur., ↑ lat. | -20%*                                         | 0%    | -25%* |
| bantam.3p    | <i>miR-450b-3p</i>                                             | -29%*                                            | -72%* | -16%* | -31%*                                       | -62%* | -18%* |                                             |                                | -43%*                                         | -96%* | -31%* |
| miR-1003.3p  | <i>miR-342-3p</i>                                              | -24%*                                            | -23%* | -25%* | -32%*                                       | -30%  | -33%* | ↑ lat.                                      | ↑ freq., ↓ ep.<br>dur., ↑ lat. | -17%*                                         | -5%   | -20%* |
| miR-263a.5p  | <i>miR-569</i>                                                 | -24%*                                            | -32%* | -21%* | -29%*                                       | -46%* | -21%* | ↓ ep. dur.                                  | ↑ freq., ↓ ep. dur.            | 7%                                            | 20%   | 2%    |
| miR-190.5p   | <i>miR-190</i>                                                 | -23%*                                            | 6%    | -36%* | -19%*                                       | 4%    | -30%* | ↑ freq., ↓ ep.<br>dur., ↓ lat.              | ↑ freq., ↓ ep.<br>dur., ↑ lat. | -5%                                           | 160%* | -32%* |
| miR-184.3p   | <i>miR-184</i>                                                 | -22%*                                            | -35%* | -18%* | -26%*                                       | -30%* | -25%* | ↓ ep. dur.                                  | ↑ lat.                         | -22%*                                         | -11%  | -25%* |
| miR-955.5p   | -                                                              | -22%*                                            | -37%* | -16%* | -23%*                                       | -46%* | -12%* | ↓ ep. dur.,<br>↑ lat.                       | ↑ freq., ↓ ep.<br>dur., ↑ lat. | -15%*                                         | -33%  | -10%* |
| miR-956.3p   | -                                                              | -21%*                                            | -42%* | -14%* | -23%*                                       | -58%* | -8%   | ↓ ep. dur.                                  | -                              | -5%                                           | -14%  | -3%   |
| miR-2b.3p    | <i>miR-499-3p</i>                                              | -20%*                                            | -44%* | -11%* | -20%*                                       | -42%* | -9%*  | ↓ ep. dur.,<br>↑ lat.                       | ↓ ep. dur.,<br>↑ lat.          | -24%*                                         | -38%* | -16%* |
| miR-981.3p   | -                                                              | -19%*                                            | -30%* | -16%* | -18%*                                       | -26%* | -14%* | ↓ freq., ↑ lat.                             | ↓ ep. dur.,<br>↑ lat.          | -21%*                                         | -71%* | -8%   |
| miR-1013.3p  | -                                                              | -18%*                                            | -36%* | -13%  | -22%*                                       | -47%* | -12%  | ↓ ep. dur.                                  | -                              | -10%                                          | -3%   | -12%* |
| miR-992.3p   | -                                                              | -18%*                                            | -56%* | -7%   | -12%                                        | -32%* | -6%   |                                             | -                              | -5%                                           | -16%  | -1%   |
| miR-281-2.5p | <i>miR-146a, miR-146b-5p, miR-9, miR-320</i>                   | -13%*                                            | -37%* | -3%   | -14%*                                       | -36%* | -4%   | ↓ ep. dur.,<br>↑ lat.                       | -                              |                                               |       |       |
| miR-962.5p   | -                                                              | -11%                                             | -30%* | -5%   | -14%*                                       | -34%* | -7%   | ↑ lat.                                      | -                              | -13%                                          | -23%  | -11%  |
| miR-972.3p   | -                                                              | 1%                                               | 35%*  | -13%* | 4%                                          | 27%*  | -7%   | ↑ freq.                                     | -                              | -24%*                                         | -20%  | -25%* |
| miR-954.5p   | -                                                              | 8%                                               | 39%*  | -5%   | 9%                                          | 36%*  | -4%   | ↑ freq.                                     | -                              | 4%                                            | 64%*  | -15%* |
| miR-275.3p   | -                                                              | 10%                                              | 60%*  | -6%   | 10%                                         | 47%*  | -4%   | ↑ freq.                                     | -                              | -1%                                           | 37%*  | -11%* |
| miR-92a.3p   | <i>miR-25, miR-32, miR-92a/b, miR-363, miR-367, miR-866-5p</i> | 15%                                              | 56%*  | -5%   | 11%*                                        | 46%*  | -5%   | ↑ freq.,<br>↓ ep. dur.,<br>↓ lat.           | -                              | -36%                                          | -60%* | -25%* |
| miR-306.5p   | <i>miR-450b-3p</i>                                             | 15%*                                             | 82%*  | 2%    | 20%*                                        | 87%*  | 5%    | ↑ ep dur.                                   | -                              | 2%                                            | 17%   | -2%   |

(Continued on next page)

**Table 1. Continued**

| Screen Hit | Human Conserv.<br>5' Sequence                                    | Control Group Change in<br>Sleep versus Scramble |       | SD Group Change in<br>Sleep versus Scramble |       | Control Group Sleep<br>Architecture Changes |                             | Nsyb>miRSP Change in<br>Sleep versus Scramble |      |       |
|------------|------------------------------------------------------------------|--------------------------------------------------|-------|---------------------------------------------|-------|---------------------------------------------|-----------------------------|-----------------------------------------------|------|-------|
|            |                                                                  | 24 hr                                            | Day   | Night                                       | 24 hr | Day                                         | Night                       | 24 hr                                         | Day  | Night |
| miR-92b.3p | miR-25, miR-32,<br>miR-92a/b,<br>miR-363, miR-367,<br>miR-866-5p | 20%*                                             | 101%* | -5%                                         | 4%    | 32%*                                        | ↑freq., ↓lat.               | -5%                                           | 12%  | -10%  |
| miR-305.3p | -                                                                | 30%*                                             | 79%*  | 13%*                                        | 17%*  | 65%*                                        | ↑freq., ↓lat.               | -1%                                           | 34%* | -9%*  |
| miR-310.3p | miR-25, miR-32,<br>miR-92a/b,<br>miR-363, miR-367,<br>miR-866-5p | 45%*                                             | 244%* | 7%                                          | 10%*  | 46%*                                        | ↑freq., ↑ep.<br>dur., ↓lat. | -12%*                                         | -21% | -10%* |

*Tub-Gal4*-driven UAS-miRSP female animals were assayed for sleep in LD, and total sleep and sleep structure parameters were compared with the *Tub-Gal4>scramble* control assayed on the same day to identify lines that affect sleep. Only lines in which sleep (day, night, or 24 hr) changed by more than 20% (italic typeface) were considered hits. The control subgroup was analyzed for significant ( $p < 0.05$ ) changes in sleep parameters, including episode duration (ep. dur.), frequency/number of episodes (freq.), and latency to sleep (lat.). Arrows indicate the direction of change for each sleep parameter. Secondary screening with *nsyb-Gal4* was carried out to determine whether the miRNA acts in neurons. \* $p < 0.05$ , Mann-Whitney test with comparison with the same-day *scramble* control. Human homologs are listed as presented by Ibáñez-Ventoso et al. (2008).

confirmed that changes in sleep after SD were not due to age or physical damage during shaking.

### miRNAs Regulate Baseline Sleep

We identified 25 miRNAs that regulate baseline sleep. Figure 1C and Table 1 show results for light period (day) and dark period (night) sleep. *MiRSPs* affect sleep in both directions; 17 *miRSPs* decreased baseline sleep, whereas eight *miRSPs* increased baseline sleep. We did not detect any sponges that increased night sleep, likely because control flies slept near the maximum possible at night (Figure 1B). Four of the *miRSPs* that decreased sleep (let-7, 263a, miR-984, and miR-986) had effects on both day and night sleep (Figures 1C and 1D). Two (miR-190 and miR-1003) affected night sleep only. Conversely, nine lines caused specific decreases in day sleep. The finding that some miRNAs affect day sleep without also affecting night sleep (and vice versa) concurs with work showing that day and night sleep are regulated by different mechanisms (Ishimoto et al., 2012). Fifteen of the 25 miRNAs we found to regulate baseline sleep (60%) are conserved in humans (Table 1; Ibáñez-Ventoso et al., 2008).

### miRNAs Regulate Sleep Structure

Total sleep in a given time period depends on the number of sleep episodes, episode duration, and the delay before sleep initiation (sleep latency). For *miRSPs* that affected baseline sleep, we observed changes in all structural parameters (Figure 1E; Table 1). Table 1 reports all changes in parameters, whereas Figure 1E reports only changes that could be causative of the observed change in total sleep.

Increased day sleep was more often associated with an increase in episode number (occurring in 88% of increased day sleep hits) rather than an increase in episode length (25% of increased day sleep hits). Conversely, decreased day sleep was more often associated with shorter episode length (80% of decreased day sleep hits) than with fewer sleep episodes (13% of decreased day sleep hits). *miRSPs* that affected night sleep, on the other hand, tended to primarily affect latency and episode duration. For all of the *miRSPs* that reduced night sleep, except for miR-184, sleep episode length was reduced. In no case was the amount of night sleep reduced because there were fewer sleep episodes.

### miRNAs Regulate Sleep Homeostasis

We discovered nine miRNAs that affect sleep homeostasis. Only one (miR-190) was required for rebound sleep (Figure 2A). Most of the hits (8 of 9) appear to function as negative regulators. Figure 2B shows data for *miR-956SP*, which is representative. After SD, these flies recover significantly more sleep than *scramble*. Figure 2C shows the difference in cumulative change in sleep relative to *scramble* at 36 hr post-SD for all lines that alter recovery. Most of the homeostasis hits did not have significant effects on baseline sleep. There were three exceptions, *miR-956SP* and *miR-955SP*, which reduced baseline day sleep but increased rebound sleep, and *miR-190SP*, which reduced baseline for both night and rebound sleep (Figure 2B). Of the nine miRNAs that were found to regulate homeostasis, six (67%) are conserved in humans (Ibáñez-Ventoso et al., 2008).

## A Cumulative change in sleep vs. baseline

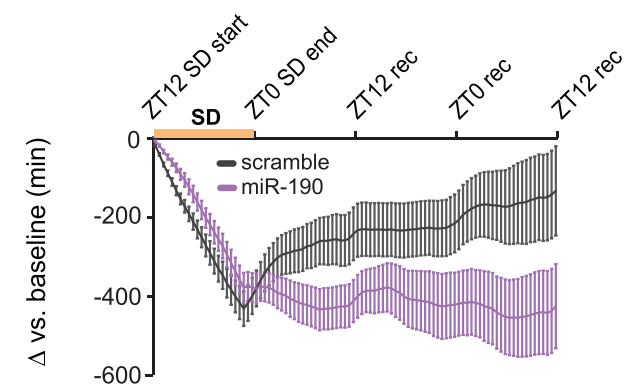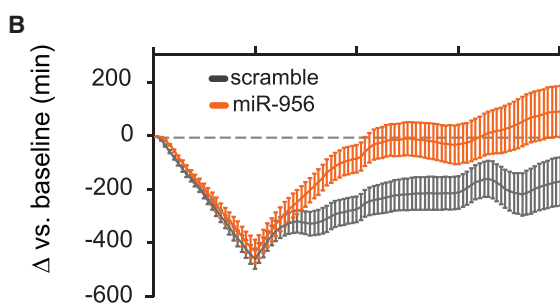

## C Cumulative change vs. scramble (after 36 hr recovery)

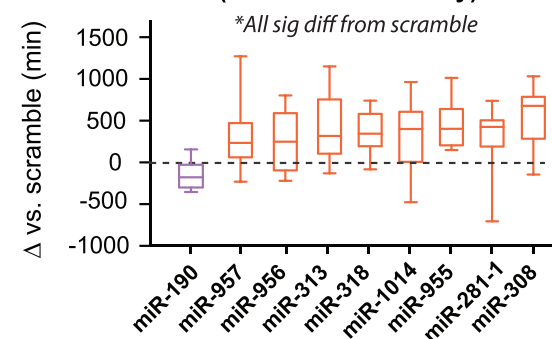

### Figure 2. MiRNAs Regulate Rebound Sleep

(A) Cumulative change in sleep for *miR-190SP* flies versus *scramble*.

(B) Cumulative change in sleep for *miR-956SP* flies versus *scramble*.

(C) Difference in cumulative change in sleep between *miRSP* flies and *scramble* (in minutes) 36 hr after SD ended.

Purple, decreased rebound; orange, increased rebound. All lines were significantly different from *scramble*.

### miRNAs Act Predominantly in Neurons to Regulate Sleep

To determine where sleep-regulating miRNAs are acting, we inhibited them specifically in neurons using a panneuronal GAL4 (*nsyb-GAL4*). Of the 24 hits we assayed (Table 1), three (*miR-263a*, *miR-92b*, and *miR-956*) failed to show a sleep phenotype. In 11 cases (46%), *nsyb>miRSP* was able to recapitulate the *tub>miRSP* phenotype with a similar magnitude effect. Seven *miRSPs* (29%) produced weak effects in the same direction as

*tubulin-Gal4* when expressed in neurons. The remaining three hits had sleep phenotypes that were qualitatively different when expressed with *nsyb-GAL4* compared with *tubulin-Gal4*. Ubiquitous expression of *miR-972SP* increased daytime sleep; however, expression of this sponge in neurons decreased both day and night sleep. Inhibition of *miR-92a* and *miR-310*, which strongly increased daytime sleep in the initial screen, inhibited sleep when limited to neurons. These differences suggest that these three miRNAs may have multiple sites of action with different effects on sleep.

### Validation of Hits Using Endogenous Mutants

We compared phenotypes generated by sponge-mediated miRNA inhibition with mutation of the cognate *miR* gene. For sponges that inhibit miRNAs with unique seed sequences, we would expect sponge to produce similar effects as mutation. Conversely, if a miRNA has multiple homologs that can compensate for its loss, then mutation may have weaker or different effects than sponge. Many miRNA genes are located in clusters with other miRNAs; therefore, some mutants were not selective for the miRNA we wanted to assess. In addition, a number of the hits from our screen have functions essential for viability. In total, we were able to find specific, viable null mutants for only 9 of our 25 hits, highlighting one aspect of the utility of miRSPs as an approach.

Endogenous mutations in *mir-184*, *mir-956*, *mir-986*, *let-7*, and *mir-1003* caused significant or borderline ( $p = 0.06$ ) changes in total sleep in the same direction as ubiquitous expression of the sponge (Figures 3A–3F). This suggests that the sponges are specific and that our screen correctly identified a role for these miRNAs in sleep. For two mutants, *mir-2b-1* and *mir-955*, we observed no significant change in sleep. It is possible that the *miR-2b* sponge inhibits both *miR-2b-1* and *miR-2b-2* and that ablation of *mir-2b-1* alone is insufficient to reduce sleep or that differences between miRNA sponges and endogenous mutants are due to different effects on the major versus the minor miR strand (Discussion).

### miRNA Family Members Have Similar Effects on Sleep

In our screen, we found that miRNA sponges designed to target miRNAs in the same family produce similar effects (Figure 3G, *miR-92* family; Figure S1, *miR-263* family). The *miR-92a* and *miR-92b* sponges' MREs differ only by four nucleotides; *miR-310* is also in this family. These sponges all increased day sleep with *tubulinGal4* (Table 1). However, none of these sponges caused increased day sleep when expressed in neurons (Figure 3G). In fact, *miR-92aSP* and *miR-310SP* reduced 24-hr and night sleep when expressed in all neurons, consistent with published reports of *miR-92a* actions in PDF<sup>+</sup> circadian neurons (Chen and Rosbash, 2017). Because these similar sponges produced similar effects on sleep in our cell specificity experiments, it suggests that our methodology can reliably interrogate the effects of miRNA families on sleep.

To determine which of the miRNAs in this family could be responsible for these effects, we measured sleep in homozygous nulls for both *mir-92a* and *mir-92b*. Because *mir-310* is located in a genomic locus with multiple miRNAs, we were

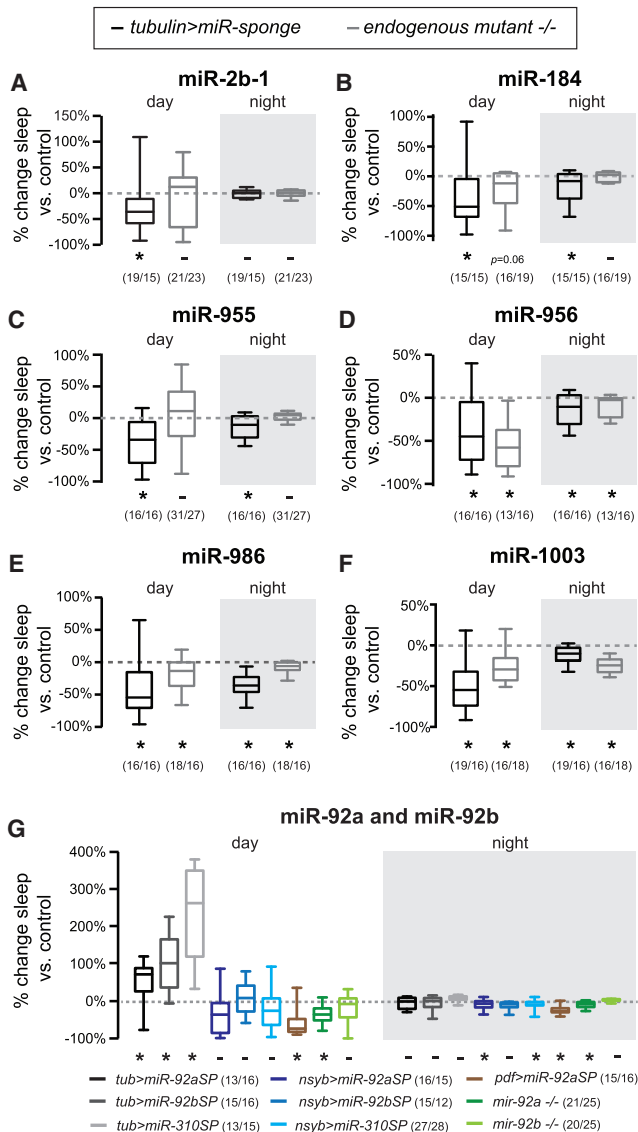

**Figure 3. Knockout of miRNA Genes Phenocopies miRSP**  
(A–F) Change in total day and night sleep for six miRNAs: miR-2b-1 (A), miR-184 (B), miR-955 (C), miR-956 (D), miR-986 (E), and miR-1003 (F). Change in *tubulin>miRSP* sleep relative to *scramble* is plotted in black. Change in knockout flies' sleep relative to genetic control is plotted in gray.  
(G) Percent change in day and night sleep relative to *scramble* or genetic background control after inhibition of miR-92 family members. miRNAs were either inhibited by expression of sponges via *tubulinGal4* (gray plots), *nsybGal4* (blue plots), or *PDFGal4* (brown) or through knockout of the *miR* gene (green plots).  
Whiskers represent maxima and minima. \*p < 0.05, -p > 0.06 using Mann-Whitney test. n values are reported next to the genotype. See also Figure S1.

not able to investigate its role using mutants. Similar to inhibition of miR-92a in neurons, knockout of *mir-92a* reduced sleep (Figure 3G). In contrast, *mir-92b* nulls had no significant change in sleep. These results suggest that miR-92a is likely acting in PDF<sup>+</sup> neurons (Figure 3G) to promote 24-hr per night sleep.

### Let-7 Promotes Sleep in LD and DD

*Let-7SP* had some of the strongest effects on sleep. Let-7 has well-characterized roles in neuronal development in mammals and *Drosophila*. Let-7's role in sleep regulation in *Drosophila* could be related to its previously described roles in circadian rhythms (Chen et al., 2014a) and/or development of the mushroom body (Kucherenko et al., 2012; Wu et al., 2012), a structure known to regulate sleep. The *Drosophila let-7* gene is located in a cluster (the *let-7* complex) with two other miRNAs, *mir-100* and *mir-125*. Knockout of all three miRNAs is lethal at the pupal stage (Sokol et al., 2008), and the functions of the three encoded miRNAs are intimately intertwined (Caygill and Johnston, 2008; Chawla et al., 2016); hence, the effects of *let-7* complex deletion mutations are difficult to properly interpret. To avoid these problems, we generated *let-7*-specific mutations using CRISPR/Cas9 technology. We chose to examine two mutant alleles, *let-7<sup>Δ12–15</sup>* and *let-7<sup>Δ13–43</sup>*, which both disrupt the *let-7.5p* seed sequence but leave the *let-7.3p*, *mir-100*, and *mir-125* sequences intact.

To ensure that changes in sleep are due to *let-7* mutation, we tested these alleles in *trans* with one another or a previously characterized deletion that removes the entire *let-7* complex (*let-7CKO*; Sokol et al., 2008). As shown in Figure 4A, all three *let-7 trans*-heterozygote groups (*let-7CKO/let-7<sup>Δ13–43</sup>*, *let-7CKO/let-7<sup>Δ12–15</sup>*, and *let-7<sup>Δ13–43</sup>/let-7<sup>Δ12–15</sup>*) had reduced day sleep relative to controls in LD. In DD, both subjective day and subjective night sleep were reduced in all three *trans*-heterozygotes (Figure 4B). These effects are not limited to female flies (Figure S2). Additionally, flies with only one mutated copy of *let-7.5p* (*let-7<sup>Δ13–43</sup>/+* and *let-7<sup>Δ12–15</sup>/+*) also showed reduced sleep. Attempts to rescue mutants by expression of *UAS-let7* under the control of *nsyb-GAL4* were unsuccessful because of lethality of *let-7* overexpression (data not shown).

Both sponge-mediated *let-7* inhibition in neurons (Table 1) and mutation of the *let-7* gene reduced sleep. To confirm that these manipulations act in the same genetic pathway, we expressed *let-7SP* neuronally in a *let-7* mutant background. If these two manipulations affect the same pathway, then we should not see a greater reduction in sleep when they are combined. Indeed, sponge-mediated inhibition of *let-7* on a *let-7* mutant background does not further sleep relative to either manipulation alone (Figure S3). These results suggest that the *let-7* sponge and CRISPR mutations specifically target *let-7*.

### Let-7 Has Developmental and Adult Roles in Sleep

To determine whether *let-7*'s role in sleep was due to a developmental function or whether it had an ongoing role in the adult nervous system, we employed a temperature-sensitive variant of Gal80 (McGuire et al., 2004) to control the timing of *let-7SP* expression. Gal80<sup>ts</sup> blocks Gal4 activity at low temperature, but at high temperature, Gal80<sup>ts</sup> repression is lost. *Tubulin-Gal80<sup>ts</sup>*; *tubulin-Gal4 > let-7SP* flies were grown at 29°C and shifted to 18°C after eclosion to inhibit *let-7* activity only during the larval and pupal stages. This eliminated the effect of *let-7* inhibition on night sleep but did not eliminate the effect of *let-7* inhibition on day sleep (Figure 4C). Conversely, inhibition of *let-7* only during adulthood reduced night sleep without affecting day sleep (Figure 4D). This suggests that *let-7* acts in

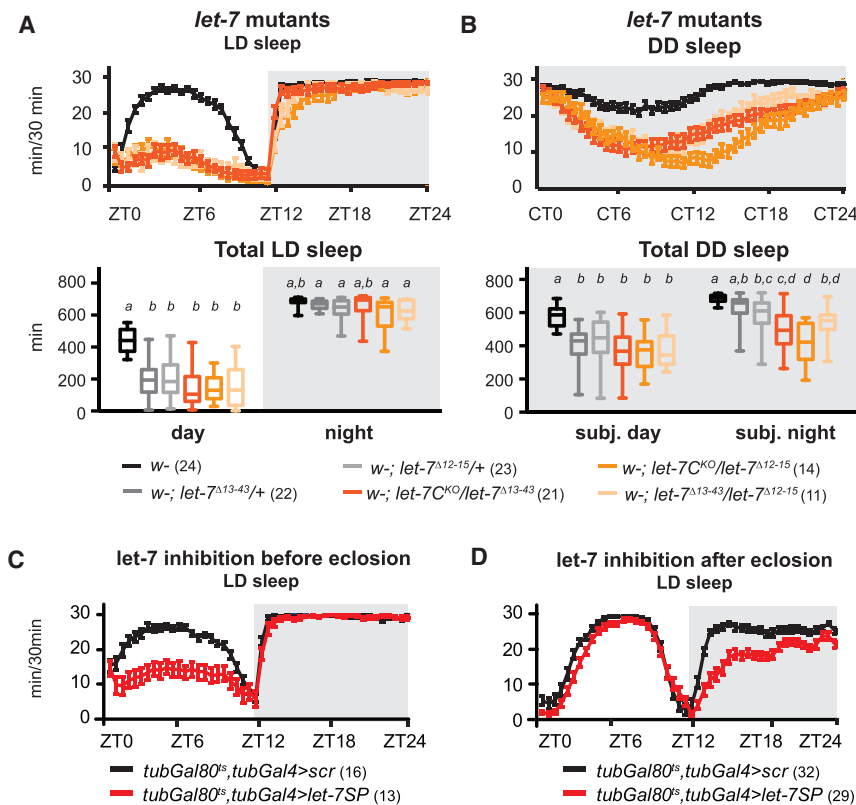

**Figure 4. Let-7 Has Developmental and Adult-Specific Roles**

(A and B) Deletions of the entire *let-7* complex (*let-7C*), most of the *let-7.5p* sequence (*let-7<sup>Δ13-43</sup>*), or the *let-7.5p* seed sequence (*let-7<sup>Δ12-15</sup>*), assayed as heterozygotes (gray plots) or *trans*-heterozygotes (orange plots), decreased day sleep in LD and DD.

(A) Sleep per 30 min (top) and total day and night sleep (bottom) in *let-7* mutants in LD. *let-7* *trans*-heterozygotes had reduced day sleep (Kruskal-Wallis test,  $p < 0.05$ ).

(B) Sleep per 30 min (top) and total sleep (bottom) in *let-7* mutants in DD. All *trans*-heterozygous *let-7* mutants had reduced sleep (Kruskal-Wallis test,  $p < 0.05$ ).

(C) *Let-7SP* was restricted to the larval and pupal stages by shifting *tubGal4*, *tubGal80ts* > *let-7SP* flies from 29°C to 18°C after eclosion. Day sleep was significantly decreased (Mann-Whitney test,  $p < 0.05$ ).

(D) *Let-7SP* expression was restricted to adulthood by shifting *tubGal4*, *tubGal80ts* > *let-7SP* from 18°C to 29°C after eclosion. Night sleep was significantly decreased (Mann-Whitney test,  $p < 0.05$ ).

Error bars represent SEM; whiskers represent maxima and minima. Numbers are reported next to the genotype. See also Figures S2 and S3.

development to ultimately affect adult day sleep but may also be required during adulthood to promote nighttime sleep.

### Let-7's Role in Sleep Is Independent of the Clock

One potential neuronal locus of *let-7* action was the clock. Chen et al. (2014a) reported that overexpression of the *let-7* complex in PDF<sup>+</sup> neurons lengthens the period of circadian locomotor rhythms; overexpression of *let-7* alone had a weaker effect. Surprisingly, knockout of the *let-7* complex did not alter the circadian period (Chen et al., 2014a). In agreement with this study, we found that *nsyb>let-7SP* flies had a lower rhythmicity index (RI; Levine et al., 2002) compared with *nsyb>scramble* (Table 2). In contrast to this study, however, we found that *let-7* inhibition (not gain of function) lengthened the circadian period. Importantly, when arrhythmic flies (with RI < 0.2) were excluded from sleep analysis, *nsyb>let-7SP* flies still displayed less sleep than *nsyb>scramble*, indicating that the changes in sleep were not due to loss of rhythmicity (Figure S4A). Similarly, when *let-7SP* was expressed in PDF<sup>+</sup> neurons, we observed no change in sleep in LD and no change in period or RI (Figure S4B; Table 2). Importantly, not all *let-7* *trans*-heterozygous mutant fly lines had a change in RI or period (Table 2), but all *let-7* *trans*-heterozygous mutants did have reduced sleep (Figure 4A). Together, these results suggest that *let-7*'s role in sleep is separable from its role in circadian rhythms. The differences between our results and those of Chen et al. (2014a) likely lie in their utilization of mutants and overexpression constructs that affect expression of

both the 5p and 3p forms of *let-7* in addition to *mir-100* and *mir-125*.

### Let-7 Is Required in Mushroom Body Neurons for Normal Sleep

Although inhibition of *let-7* in PDF<sup>+</sup> neurons did not change sleep, our data (Table 1) suggest that it acts in neurons. To determine whether the MBs were the neuronal locus of *let-7* action, we used *VT030559Gal4* (a strong pan-MB driver) to express *let-7SP*. Both LD and DD sleep were significantly reduced (Figures 5A and 5B), although the reduction during the day was not as great as that seen for *let-7* nulls. This could be due to residual activity of *let-7* in the mushroom body (MB) because sponges are not knockouts, or it could suggest that there are other sleep-regulating brain regions that require *let-7*.

To test the contribution of the MB to the panneuronal *let-7* phenotype (Table 1), we combined *nsybGal4*-driven expression of *let-7SP* with MB-specific repression of Gal4 activity using *MB-Gal80*. When *let-7* is inhibited panneuronally, day and night sleep are reduced to levels comparable with *let-7* nulls in both LD and DD (Figure 5C). Restoring *let-7* activity to the MB partially reversed the effects of panneuronal inhibition on day and night sleep in LD and subjective night sleep in DD (Figure 5D). These data suggest that, although MBs are an important locus of *let-7* action, there are likely other neurons that contribute. In support of this, experiments driving *let-7SP* with *ChaTGal4*, a driver that expresses both in MBs and other neurons, produced a phenotype that was very similar to *nsybGal4* (data not shown).



**Table 2. Circadian Parameters for *let-7* miRSP and *let-7* Mutants**

|                                                      | Period        | RI           | % Rhythmic |
|------------------------------------------------------|---------------|--------------|------------|
| <i>nsyb&gt;scramble</i>                              | 24.29 ± 0.09  | 0.44 ± 0.02  | 100%       |
| <i>nsyb&gt;let-7SP</i>                               | 25.21 ± 0.24* | 0.31 ± 0.04* | 64%        |
| <i>Pdf&gt;scramble</i>                               | 24.12 ± 0.06  | 0.39 ± 0.02  | 94%        |
| <i>Pdf&gt;let-7SP</i>                                | 24.15 ± 0.13  | 0.35 ± 0.02  | 85%        |
| <i>w</i>                                             | 24.42 ± 0.28  | 0.28 ± 0.02  | 75%        |
| <i>let-7C/let-7<sup>Δ13-43</sup></i>                 | 24.76 ± 0.25  | 0.25 ± 0.03  | 62%        |
| <i>let-7C/let-7<sup>Δ12-15</sup></i>                 | 24.96 ± 0.28  | 0.29 ± 0.02  | 93%        |
| <i>let-7<sup>Δ13-43</sup>/let-7<sup>Δ12-15</sup></i> | 24.23 ± 0.32  | 0.19 ± 0.05* | 45%        |

Animals of the indicated genotypes were entrained in LD and released into DD to assay clock function. Period and rhythmicity index (RI; Levine et al., 2002) were calculated. Flies with RI > 0.2 were considered rhythmic. *nsyb>let-7SP* was significantly different from its genetic control (*nsyb>scramble*) for period and RI. *let-7<sup>Δ13-43</sup>/let-7<sup>Δ12-15</sup>* mutants were significantly different from the *w* genetic control for RI. \*p < 0.05, t test (period) or Mann-Whitney test (RI). See also Figure S4.

## DISCUSSION

We identified 25 miRNAs that regulate aspects of sleep. Although little is known in general about the role of miRNAs in human sleep, increases in the mammalian homologs of four of the sleep-promoting hits from our screen are associated with low-sleep states (Davis et al., 2007, 2012; Holm et al., 2014; Matos et al., 2014). These studies suggest that there may be conservation of function for certain miRNAs in regulation of sleep across phylogeny.

Unexpectedly, our screen identified eight miRNAs that negatively regulate rebound sleep but only one miRNA (miR-190) that is required. This raises a question: why might it be advantageous to limit rebound? Rebound sleep after SD exists within a hierarchy of multiple competing behaviors (e.g., foraging, mating, egg laying), and sleep is modulated by multiple physiological and sensory inputs (e.g., hunger, circadian rhythms, light, mating status, and temperature). These miRNAs may help prioritize some other behavior over rebound sleep. Alternatively, these miRNAs might be sensors of recovery processes that occur during rebound and function to prolong sleep when recovery is ineffective. Future studies are needed to determine the role these miRNAs play in sleep homeostasis.

There are many important differences between sponge-mediated inhibition and mutation of miRNA genes, but these strategies provide complementary insights into miRNA function. miRNA sponges have hypomorphic effects, whereas gene knockouts are nulls. Sponges, therefore, may fail to show effects when complete loss of the miRNA is required for a phenotype. On the other hand, sponges can be used to investigate the function of miRNAs that are essential for development or survival. Sponges inhibit multiple miRNAs in the same family, which can create ambiguity around which miRNA is causative; however, they eliminate the possibility that homologous miRNAs mask a phenotype. miRNA sponges target only the 5p or 3p miR sequence, whereas knockouts typically eliminate both mature strands. Finally, miRNA sponges are transgenes, and coupling with the Gal4/UAS system allows interrogation of when and where miRNAs are required.

In the case of *let-7*, sponge technology allowed us to identify the MB as one of *let-7*'s sites of action and to discover that *let-7* plays distinct roles in development and adulthood, whereas *let-7* mutants allowed us to verify that *let-7.5p* itself (and not other homologous miRNAs inhibited by the sponge) increases sleep. Previously described *let-7* complex knockout approaches also disrupt *let-7*'s neighboring miRNAs, miR-100 and miR-125; therefore, previous attempts to specifically study *let-7* relied on transgenic rescue of miR-100 and miR-125. This approach can cause neomorphic effects because of overexpression, particularly because miR-125 and *let-7* have some mRNA targets in common (Chawla et al., 2016). To avoid this issue, we generated mutations in *let-7* that specifically affect the 5p sequence without affecting *mir-100* or *mir-125*. These mutations, either in *trans* with one another or with a *let-7* complex knockout, reduce sleep in both males and females under LD and DD conditions.

Although we found some evidence to support the idea that *let-7* regulates circadian rhythms (Table 2), not all of our results were consistent with the *let-7* complex deletion literature (Chen et al., 2014a). Most importantly, we found that *let-7* is not required in PDF<sup>+</sup> neurons for its role in sleep and that reductions in sleep caused by *let-7* inhibition were not due to loss of circadian rhythmicity (Figure S4). Therefore, *let-7* appears to play a role in sleep that is independent of any effects it may have on circadian rhythms.

Our evidence suggests that *let-7*'s role in sleep is partially mediated through the MB, a region known to be involved in regulation of sleep (Joiner et al., 2006; Pitman et al., 2006). Inhibition of *let-7* in MB neurons reduced day and night sleep, and restoring *let-7* activity in the MB in *nsyb>let-7SP* flies partially reversed the effects of panneuronal knockdown. This is consistent with *let-7*'s known role in regulation of MB lobe development (Kucherenko et al., 2012; Wu et al., 2012) and our finding that *let-7* is required during development for its effects on day sleep. Recent work has implicated the  $\alpha'$ ,  $\beta'$ , and  $\gamma$  lobes of the MB in sleep regulation (Sitaraman et al., 2015). Our results suggest that *let-7* may affect the function of these neuronal subsets. Comparison of the magnitude of inhibition of sleep using MB drivers with that of *let-7* mutants and panneuronal or *ChaTGal4*-driven inhibition, however, argues that there are also other neurons that are important.

There may also be an acute function of *let-7* in adults. *let-7* levels change with time of day in adult *Drosophila* (Chen et al., 2014a) and are modulated by SD in adult mammals (Davis et al., 2007), suggesting a potential role for *let-7* in the adult brain. We found that *let-7SP* expression in adulthood reduced night sleep in females, although night sleep did not significantly change in males or *let-7* mutants. *Let-7* may therefore have a weak female-specific role in night sleep in the fly.

Sleep is regulated by many cell types, including neurons, glia, and endocrine cells. Consistent with this idea, roughly a quarter of our hits were not required in neurons for their effects. We identified one miRNA family, miR-263a/b, that appears to be required in glia rather than neurons for its effects on sleep. This is of particular interest because a complementary *miRSP*-based genetic screen has identified multiple miRNAs that function in adult glial astrocytes to regulate circadian rhythmicity (You et al., 2018). However, determining where a miR is required for its

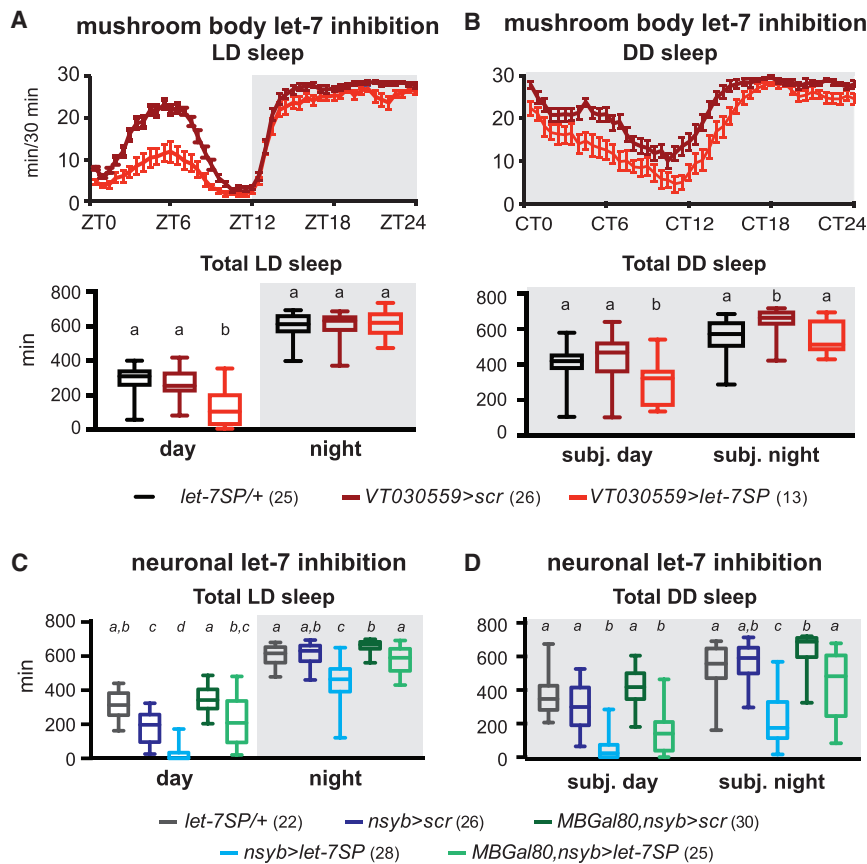

**Figure 5. Let-7 Is Required in MB Neurons to Promote Sleep**

(A) *Let-7SP* expressed in Kenyon cells (*VT030559Gal4*) reduces day sleep in LD. (B) MB-specific expression of *let-7SP* reduces both day and night sleep in DD. (C) *Let-7SP* was expressed in all neurons (*nsybGal4*) or in all neurons except MB neurons (*nsybGal4, MBGal80*). The effect of panneuronal inhibition (blue) was partially blocked by restoring *let-7* in the MB (green, Kruskal-Wallis test,  $p < 0.05$ ). (D) Panneuronal *let-7* inhibition decreased subjective day and night sleep in DD (blue). Restoring *let-7* to the MB reversed the effect of neuronal inhibition (green, Kruskal-Wallis test,  $p < 0.05$ ). Error bars represent SEM; whiskers represent maxima and minima.

(BL#58940), *w*;  $\{w^{mW.hs}Gal4\}mir-956/TM3, Ser$  (BL#58941),  $w$ ;  $\{T\}mir-986^{KO}$  (BL#58959), and  $w$ ;  $\{T\}mir-1003^{KO}$  (BL#58883), described by Chen et al. (2014b), and *let-7C<sup>KO1</sup>*, described by Sokol et al. (2008). Mutants for miR-92a and miR-92a (*Yuva-Aydemir et al., 2015*) were obtained from Fen-Biao Gao (University of Massachusetts [UMASS] Medical School).

#### Circadian and Sleep Assays

Sleep was assayed as described previously (Donelson et al., 2012) using the *Drosophila* activity monitoring (DAM) system (Trikinetics, Waltham, MA). For flies in the SD subgroup, 3 days of baseline sleep were recorded, followed by 12 hr SD. During SD, flies were shaken for 2 s every 10 s,

effects on sleep is only a starting point for understanding the specific genetic pathways. Because miRNAs regulate many cellular functions and aspects of development, the miRNAs identified here could regulate sleep through widely divergent mechanisms. Future studies will be required to dissect those mechanisms and, in particular, to identify the relevant sleep-related mRNA targets, which could shed light on the mechanisms of sleep and sleep homeostasis.

#### EXPERIMENTAL PROCEDURES

##### *Drosophila* Husbandry

*Drosophila* were raised on cornmeal-dextrose-yeast agar medium at 25°C in a 12-hr LD cycle with two exceptions. To enhance viability, after eclosion, *let-7* mutants were housed and assayed at 18°C. To restrict *let-7* sponge expression to development or adulthood with *tubulinGal80<sup>ts</sup>*, flies were reared and assayed at either 18°C or 29°C as described. For the screen and for all other experiments (except for Figure S2), we assayed 3- to 5-day-old mated females. In experiments involving *let-7* mutants, we expanded the age range to 3–7 days old using similarly aged controls.

##### *Drosophila* Lines

UAS-miRNA sponge lines (*w*; UAS-mCherry-sponge/CyO; UAS-mCherry sponge/TM6b) have been described previously (Fulga et al., 2015). Gal4 strains included *w*; pTub-Gal4DCR1014/TM3, *w*; pnsyb-Gal4/TM6b, *w*; pTub-Gal80<sup>ts</sup>, *w*; MB-Gal80 (Thum et al., 2007), *w*; pPDF-Gal4, *repo-Gal*, and *w*; *VT030559Gal4* (VDR ID# v206077). miRNA knockout alleles included *w*;  $\{w^{mW.hs}\}mir-2b-1^{KO}$  (Bloomington #58915), *w*;  $\{w^{mW.hs}\}mir-184^{KO}$  (BL#58896), *w*; *mir-263bΔ* (BL#58903), *w*;  $\{w^{mW.hs}Gal4\}mir-955^{KO}$

beginning at Zeitgeber time (ZT)12 and ending at ZT0. Recovery sleep was measured for 2 days. The strength of shaking was adjusted so that *scramble* flies had pronounced rebound sleep on day 1 after SD but returned to baseline sleep levels by day 2. To measure circadian rhythms, mated female flies were entrained for 3 days in LD and then switched to dark:dark (DD) for 6 to 7 days.

##### Generation of *let-7* Mutants

To generate specific *let-7* mutants, a 20-nt guide RNA (gRNA) (5'-CTC TGGCAAATTGAGGTAGT-3'), designed to target the AGG PAM sequence located in the +20 position of *pre let-7*, was ligated into the dU6-J28 gRNA vector (Port et al., 2014). The vector was injected into *w*;  $\{P\}CaryPattP2$  (Rainbow Transgenic Flies). Transgenic flies were crossed with *yw*,  $\{pActin5c-Cas9, w^+\}$  (BL#54590), and male flies with putative mutations in *let-7* were housed singly with *w*; *Sp/CyO* virgin females. Progeny were crossed and homozygotes and screened by PCR and sequencing of *let-7* locus.

Multiple viable *let-7* alleles were isolated. *let-7<sup>Δ12-15</sup>*, a 4-bp (GAGG) deletion spanning the +2–5 position of *let-7.5p* removes half of the genomic region encoding *let-7.5p*'s seed. *let-7<sup>Δ13-43</sup>*, a larger 31-bp deletion with a 2-bp (TA) insertion that spans positions 13–41 of the *let-7* hairpin, removes 20 of 22 bp of the mature *let-7.5p* sequence but does not disrupt the genomic region encoding the *let-7.3p* strand. Both alleles were outcrossed at least 4 times to a Cantonized *w* line (*w<sup>CS</sup>*), and mutations were verified with PCR and sequencing. *let-7* mutant homozygotes had reduced viability and fecundity but were viable for up to a week after eclosion as adults.

##### Analysis Software

Sleep analysis was performed using an in-house MATLAB program called Sleep and Circadian Analysis MATLAB Program (SCAMP) (Donelson et al., 2012). Sleep recovery after SD was measured as the cumulative change in sleep relative to each fly's own baseline. Circadian rhythmicity patterns were

analyzed using SCAMP's autocorrelation function (Levine et al., 2002). The height of the third peak is designated as the RI. We considered RI < 0.2 to be "arrhythmic."

### Statistical Testing

For each sponge, the percent change in day, night, and 24-hr sleep relative to concurrently tested *scramble* flies was calculated. For other sleep parameters, data were tested for normality using a Kolmogorov-Smirnov test and then compared with *scramble* data using either t test or Mann-Whitney test. For experiments in which more than 2 groups were compared, Dunn's multiple comparison tests were used. To compare circadian periods, we used ANOVA with Tukey *post hoc* testing. To compare RI values, we performed Kruskal-Wallis ANOVA with Dunn's multiple comparison tests.

### Controls for Locomotion- and Age-Related Artifacts

For hits that increased sleep, we calculated activity during waking epochs to rule out decreased locomotion. To rule out age as a factor in homeostasis hits, we examined the cumulative change in sleep in the non-SD subgroup across the last 60 hr of the experiment to confirm that sponge effects remained stable.

### SUPPLEMENTAL INFORMATION

Supplemental Information includes four figures and can be found with this article online at <https://doi.org/10.1016/j.celrep.2018.05.078>.

### ACKNOWLEDGMENTS

This work was supported by NIH grants P01 NS090994 (to D.V.V. and L.C.G.) and F32 GM109531 and T32 NS7292-28 (to P.R.G.). We thank Stephen Alkins and Rob Jackson for comments on the manuscript.

### AUTHOR CONTRIBUTIONS

Conceptualization, D.V.V., L.C.G., and P.R.G.; Methodology, D.V.V., T.A.F., and P.R.G.; Investigation, P.R.G., A.M., J.M., and M.H.; Writing – Original Draft, P.R.G.; Writing – Review and Editing, L.C.G. and D.V.V.; Supervision and Funding Acquisition, L.C.G. and D.V.V.

### DECLARATION OF INTERESTS

The authors declare no competing interests.

Received: January 26, 2018

Revised: March 29, 2018

Accepted: May 23, 2018

Published: June 26, 2018

### REFERENCES

- Artushin, G., and Sehgal, A. (2017). The *Drosophila* circuitry of sleep-wake regulation. *Curr. Opin. Neurobiol.* *44*, 243–250.
- Caygill, E.E., and Johnston, L.A. (2008). Temporal regulation of metamorphic processes in *Drosophila* by the *let-7* and miR-125 heterochronic microRNAs. *Curr. Biol.* *18*, 943–950.
- Chawla, G., Deosthale, P., Childress, S., Wu, Y.C., and Sokol, N.S. (2016). A *let-7*-to-miR-125 MicroRNA Switch Regulates Neuronal Integrity and Lifespan in *Drosophila*. *PLoS Genet.* *12*, e1006247.
- Chen, X., and Rosbash, M. (2017). MicroRNA-92a is a circadian modulator of neuronal excitability in *Drosophila*. *Nat. Commun.* *8*, 14707.
- Chen, W., Liu, Z., Li, T., Zhang, R., Xue, Y., Zhong, Y., Bai, W., Zhou, D., and Zhao, Z. (2014a). Regulation of *Drosophila* circadian rhythms by miRNA *let-7* is mediated by a regulatory cycle. *Nat. Commun.* *5*, 5549.
- Chen, Y.W., Song, S., Weng, R., Verma, P., Kugler, J.M., Buescher, M., Rouam, S., and Cohen, S.M. (2014b). Systematic study of *Drosophila* microRNA functions using a collection of targeted knockout mutations. *Dev. Cell* *31*, 784–800.
- Davis, C.J., Bohnet, S.G., Meyerson, J.M., and Krueger, J.M. (2007). Sleep loss changes microRNA levels in the brain: a possible mechanism for state-dependent translational regulation. *Neurosci. Lett.* *422*, 68–73.
- Davis, C.J., Clinton, J.M., and Krueger, J.M. (2012). MicroRNA 138, *let-7b*, and 125a inhibitors differentially alter sleep and EEG delta-wave activity in rats. *J. Appl. Physiol.* (1985) *113*, 1756–1762.
- Donelson, N.C., Kim, E.Z., Slawson, J.B., Vecsey, C.G., Huber, R., and Griffith, L.C. (2012). High-resolution positional tracking for long-term analysis of *Drosophila* sleep and locomotion using the "tracker" program. *PLoS ONE* *7*, e37250.
- Fulga, T.A., McNeill, E.M., Binari, R., Yelick, J., Blanche, A., Booker, M., Steinkraus, B.R., Schnall-Levin, M., Zhao, Y., DeLuca, T., et al. (2015). A transgenic resource for conditional competitive inhibition of conserved *Drosophila* microRNAs. *Nat. Commun.* *6*, 7279.
- Hendricks, J.C., Finn, S.M., Panckeri, K.A., Chavkin, J., Williams, J.A., Sehgal, A., and Pack, A.I. (2000). Rest in *Drosophila* is a sleep-like state. *Neuron* *25*, 129–138.
- Holm, A., Bang-Berthelsen, C.H., Knudsen, S., Kornum, B.R., Modvig, S., Jennum, P., and Gammeltoft, S. (2014). miRNA profiles in plasma from patients with sleep disorders reveal dysregulation of miRNAs in narcolepsy and other central hypersomnias. *Sleep (Basel)* *37*, 1525–1533.
- Huntzinger, E., and Izaurralde, E. (2011). Gene silencing by microRNAs: contributions of translational repression and mRNA decay. *Nat. Rev. Genet.* *12*, 99–110.
- Ibáñez-Ventoso, C., Vora, M., and Driscoll, M. (2008). Sequence relationships among *C. elegans*, *D. melanogaster* and human microRNAs highlight the extensive conservation of microRNAs in biology. *PLoS ONE* *3*, e2818.
- Ishimoto, H., Lark, A., and Kitamoto, T. (2012). Factors that Differentially Affect Daytime and Nighttime Sleep in *Drosophila melanogaster*. *Front. Neurol.* *3*, 24.
- Joiner, W.J., Crocker, A., White, B.H., and Sehgal, A. (2006). Sleep in *Drosophila* is regulated by adult mushroom bodies. *Nature* *441*, 757–760.
- Kucherenko, M.M., Barth, J., Fiala, A., and Shcherbata, H.R. (2012). Steroid-induced microRNA *let-7* acts as a spatio-temporal code for neuronal cell fate in the developing *Drosophila* brain. *EMBO J.* *31*, 4511–4523.
- Levine, J.D., Funes, P., Dowse, H.B., and Hall, J.C. (2002). Signal analysis of behavioral and molecular cycles. *BMC Neurosci.* *3*, 1.
- Matos, G., Scorza, F.A., Mazzotti, D.R., Guindalini, C., Cavalheiro, E.A., Tufik, S., and Andersen, M.L. (2014). The effects of sleep deprivation on microRNA expression in rats submitted to pilocarpine-induced status epilepticus. *Prog. Neuropsychopharmacol. Biol. Psychiatry* *51*, 159–165.
- McGuire, S.E., Mao, Z., and Davis, R.L. (2004). Spatiotemporal gene expression targeting with the TARGET and gene-switch systems in *Drosophila*. *Sci. STKE* *2004*, pl6.
- McNeill, E., and Van Vactor, D. (2012). MicroRNAs shape the neuronal landscape. *Neuron* *75*, 363–379.
- Pitman, J.L., McGill, J.J., Keegan, K.P., and Allada, R. (2006). A dynamic role for the mushroom bodies in promoting sleep in *Drosophila*. *Nature* *441*, 753–756.
- Port, F., Chen, H.M., Lee, T., and Bullock, S.L. (2014). Optimized CRISPR/Cas tools for efficient germline and somatic genome engineering in *Drosophila*. *Proc. Natl. Acad. Sci. USA* *111*, E2967–E2976.
- Shaw, P.J., Cirelli, C., Greenspan, R.J., and Tononi, G. (2000). Correlates of sleep and waking in *Drosophila melanogaster*. *Science* *287*, 1834–1837.
- Sitaraman, D., Aso, Y., Jin, X., Chen, N., Felix, M., Rubin, G.M., and Nitabach, M.N. (2015). Propagation of Homeostatic Sleep Signals by Segregated Synaptic Microcircuits of the *Drosophila* Mushroom Body. *Curr. Biol.* *25*, 2915–2927.

- Sokol, N.S., Xu, P., Jan, Y.N., and Ambros, V. (2008). *Drosophila* let-7 microRNA is required for remodeling of the neuromusculature during metamorphosis. *Genes Dev.* 22, 1591–1596.
- Thum, A.S., Jenett, A., Ito, K., Heisenberg, M., and Tanimoto, H. (2007). Multiple memory traces for olfactory reward learning in *Drosophila*. *J. Neurosci.* 27, 11132–11138.
- Vodala, S., Pescatore, S., Rodriguez, J., Buescher, M., Chen, Y.W., Weng, R., Cohen, S.M., and Rosbash, M. (2012). The oscillating miRNA 959-964 cluster impacts *Drosophila* feeding time and other circadian outputs. *Cell Metab.* 16, 601–612.
- Wu, Y.C., Chen, C.H., Mercer, A., and Sokol, N.S. (2012). Let-7-complex microRNAs regulate the temporal identity of *Drosophila* mushroom body neurons via *chinmo*. *Dev. Cell* 23, 202–209.
- You, S., Fulga, T.A., Van Vactor, D., and Jackson, F.R. (2018). Regulation of Circadian Behavior by Astroglial MicroRNAs in *Drosophila*. *Genetics* 208, 1195–1207.
- Yuva-Aydemir, Y., Xu, X.L., Aydemir, O., Gascon, E., Sayin, S., Zhou, W., Hong, Y., and Gao, F.B. (2015). Downregulation of the Host Gene *jigr1* by miR-92 Is Essential for Neuroblast Self-Renewal in *Drosophila*. *PLoS Genet.* 11, e1005264.

**Cell Reports, Volume 23**

**Supplemental Information**

**MicroRNAs Regulate Sleep and Sleep Homeostasis  
in *Drosophila***

**Patricia R. Goodwin, Alice Meng, Jessie Moore, Michael Hobin, Tudor A. Fulga, David Van Vactor, and Leslie C. Griffith**

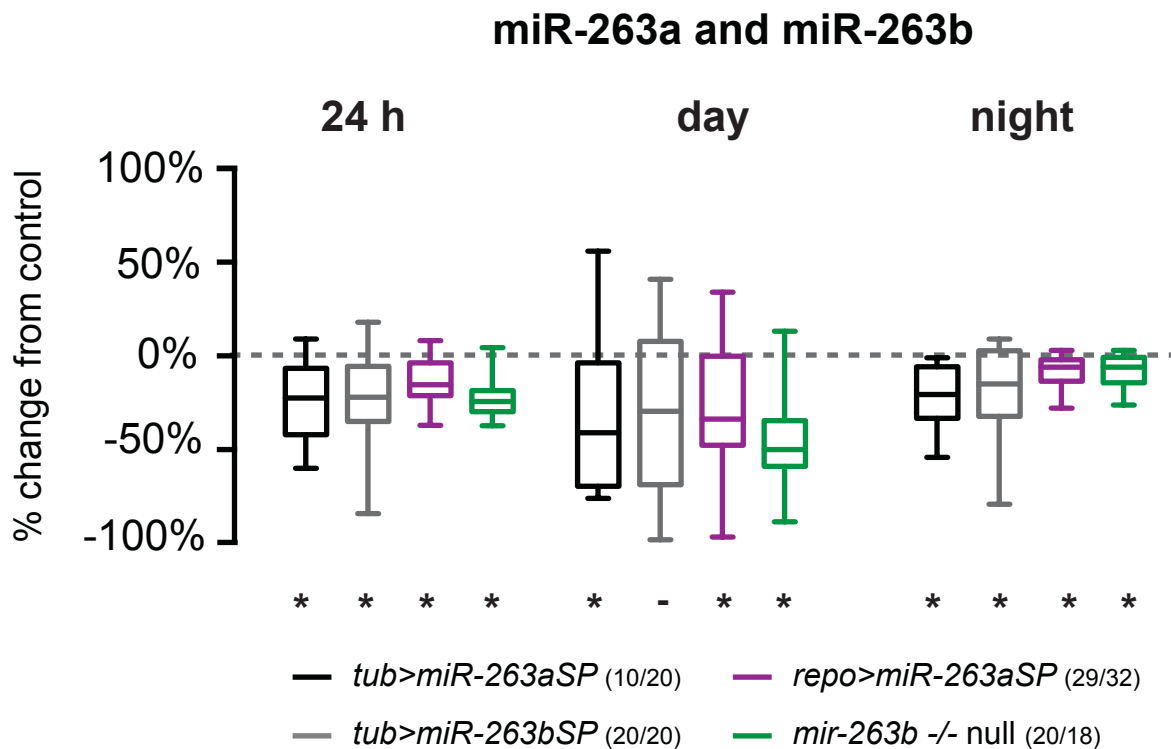

**Supplemental Figure 1. Sponges targeting miRs in the same family have similar effects on sleep. Related to Figure 3.** Ubiquitous expression of miR-263aSP decreased 24 h, day, and night sleep. Although miR-263bSP did not satisfy all the criteria to be considered a hit, it was very close to the cut-off (24 h sleep for control group: -22%,  $p < 0.05$ ; 24 h sleep for SD group: -19%,  $p = 0.057$ ). We found that miR-263a is not required in neurons for its effect on sleep (Table 1). However, inhibition of miR-263a in glia via expression of miR-263aSP with *repo Gal4* significantly reduced 24 h, day, and night sleep. We were not able to investigate the effect of *mir-263a* mutations on sleep, because homozygous mutants are not viable as adults; however *mir-263b* mutants displayed reduced 24 h, day, and night sleep relative to controls. These results support a glial role for the miR-263 family in sleep.

Figure shows percent change in 24 h, day, and night sleep relative to scramble or genetic background control after inhibition of miR-236a and miR-263b by expression of sponges with *tubulinGal4* (grey plots), glia-specific *repoGal4* (purple plots), or through knockout of the *mir-263b* gene (green). \* $p < 0.05$ , - $p > 0.05$  using Mann-Whitney test. N values are reported next to genotype.

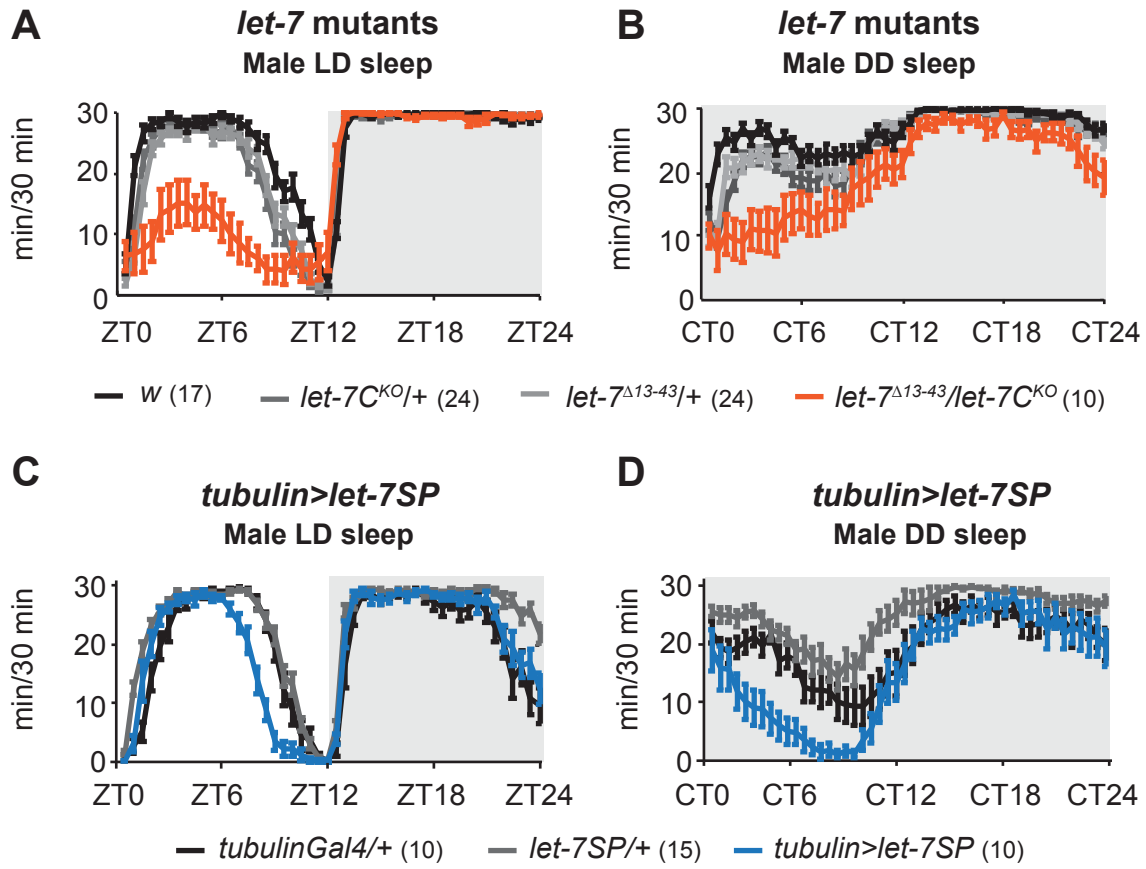

**Supplemental Figure 2. Let-7 regulates sleep in males. Related to Figure 4.** Sleep per 30 min in *let-7CKO/let-7Δ13-43*, *let-7CKO/+*, *let-7Δ13-43/+*, and *w* male flies in L:D (A) and D:D (B). Sleep per 30 min in *tubulin>let-7SP*, *tubulinGal4/+*, and *UAS-let-7SP* male flies in L:D (C) and D:D (D). N values are reported next to genotype.

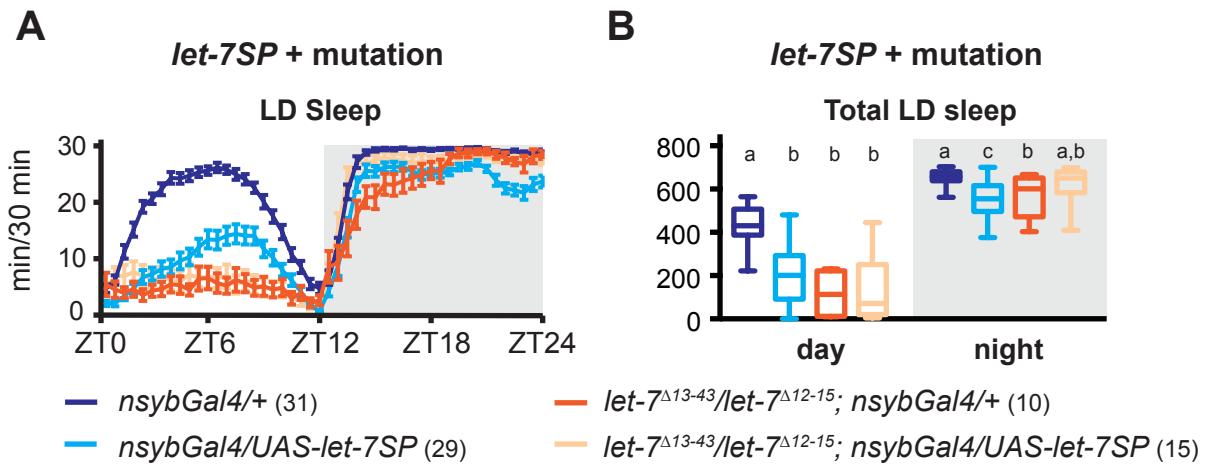

**Supplemental Figure 3. Let-7SP and let-7 mutations affect sleep through the same pathway. Related to Figure 4.** Sleep per 30 min (A) and total sleep (B) for female *let-7* mutant flies expressing *let-7SP* in neurons (*w; let-7<sup>Δ13-43</sup>/let-7<sup>Δ12-15</sup>; nsybGal4/UAS-let-7SP*), *let-7* mutant flies (*w; let-7<sup>Δ13-43</sup>/let-7<sup>Δ12-15</sup>; nsybGal4/+*), flies expressing *let-7SP* in neurons (*w;; nsybGal4/UAS-let-7SP*) and control (*nsybGal4/+*) flies. Flies with both the sponge and mutations were not significantly different from flies with the sponge alone or mutations alone (Kruskal-Wallis,  $p < 0.05$ ). N values are reported next to genotype.



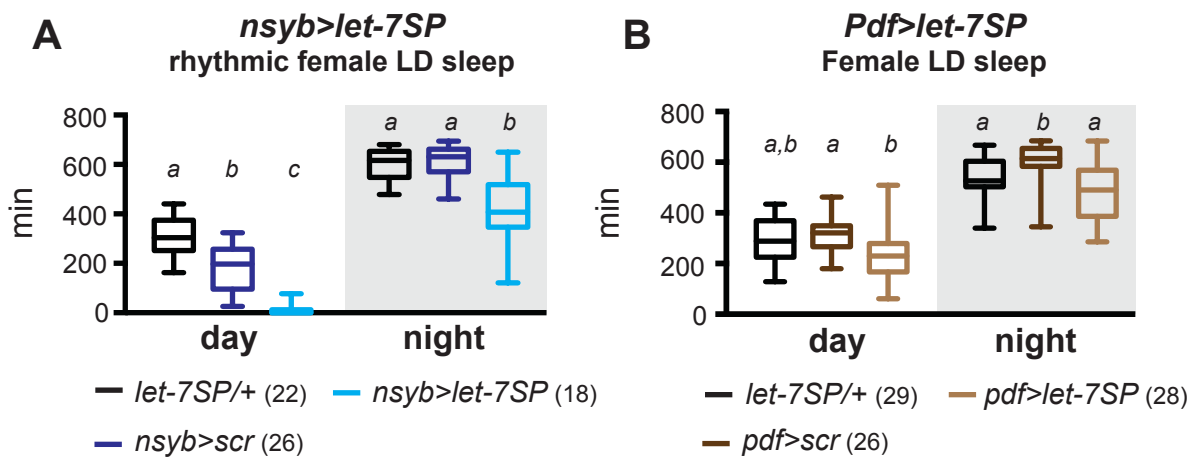

**Supplemental Figure 4. Related to Table 2 (A)** *Nsyb>let-7SP* flies with normal circadian rhythms have reduced sleep. Total sleep in *nsyb>let-7SP*, *nsyb>scramble*, and *UAS-let-7SP/+* females in L:D after excluding any flies that were later arrhythmic in D:D. **(B)** Let-7 is not required in PDF+ neurons to promote sleep. Total sleep in *PDF>let-7SP*, *PDF>scramble*, and *UAS-let-7SP/+* female flies in L:D.
